# Supplementary material
Source: MDPI journal article supplement (https://www.mdpi.com/2073-4433/14/1/117)
Supplement: s1 [file s1 › atmosphere-2073360-supplementary.pdf]

## Supplemental Materials:

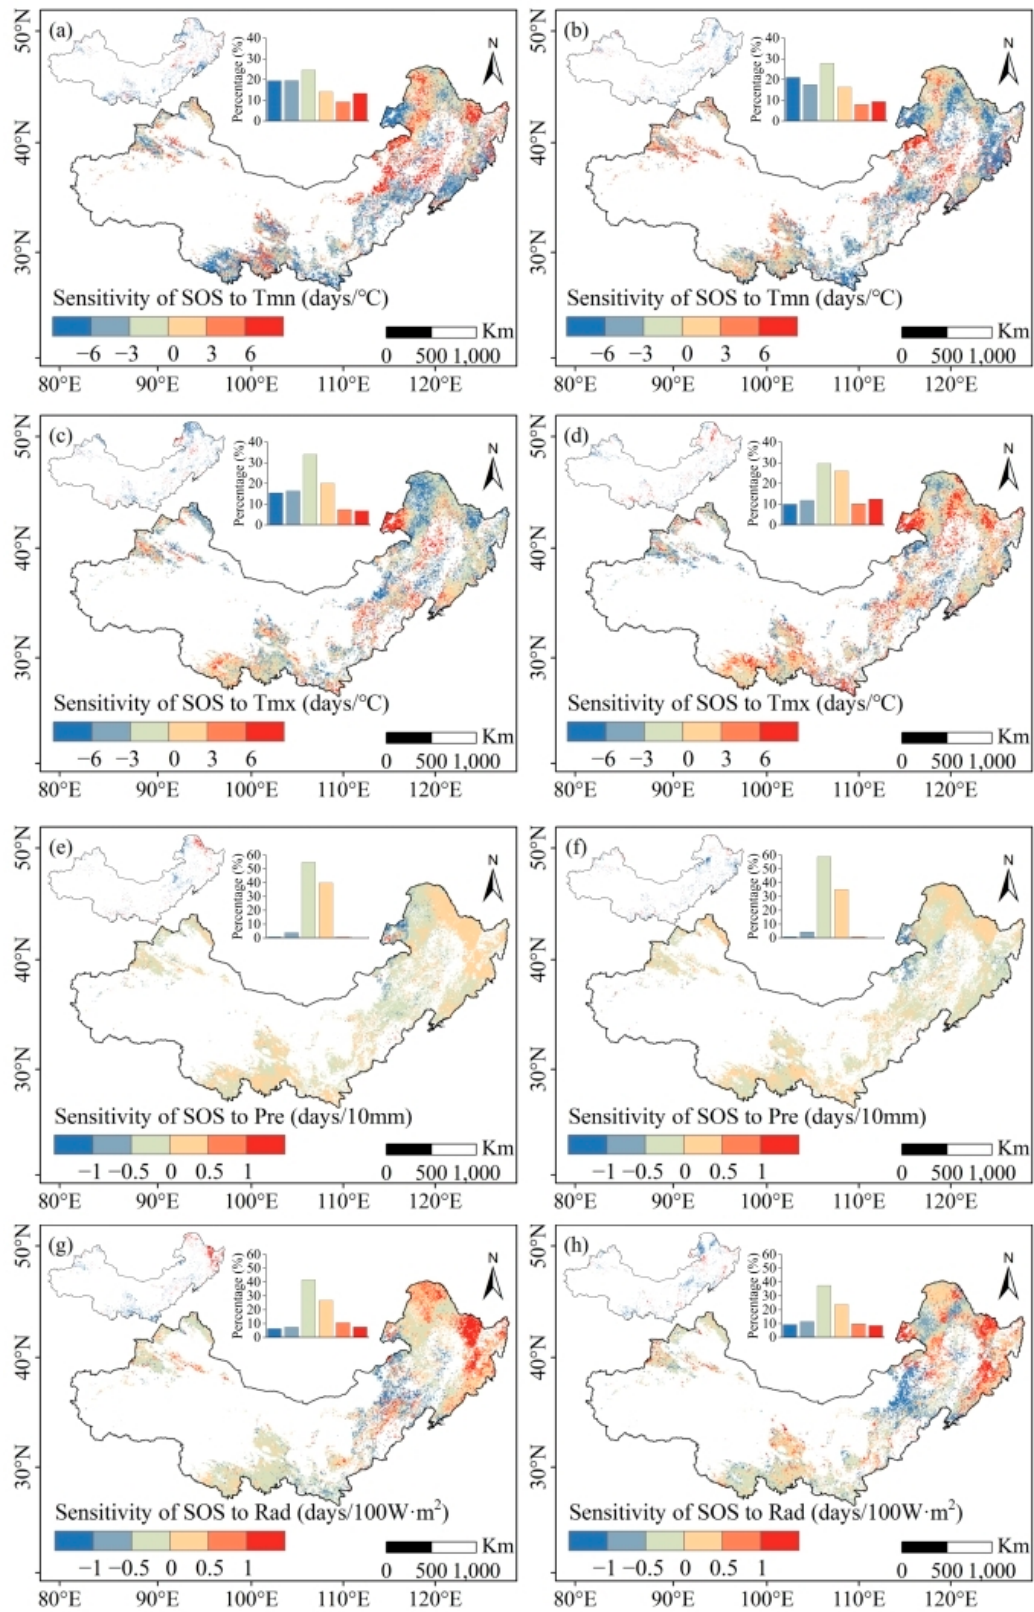

**Figure S1.** The spatial pattern of the sensitivity of SOS to preseason (a, b) Tmn, (c, d) Tmx, (e, f) Pre, and (g, h) Rad in two sub-periods. (a, c, e, g): before 1998; (b, d, f, h):

after 1998. The top insets show the proportions of different numerical grades. The top-left insets show the spatial patterns of significance at  $p < 0.05$ , where red (blue) represents positive (negative) values.

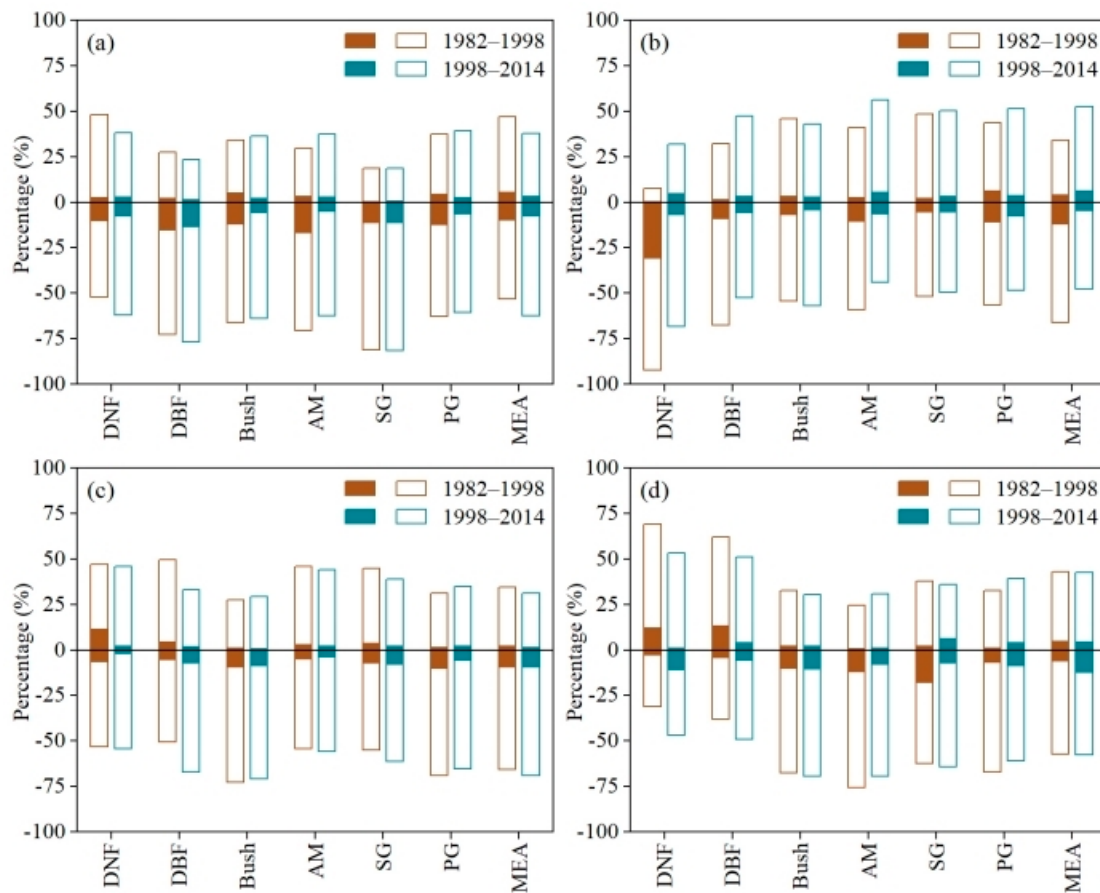

**Figure S2.** The sensitivity of SOS to preseason (a) Tmn, (b) Tmx, (c) Pre, and (d) Rad at the vegetation type scale in two sub-periods. Solid color blocks represent significant correlations.

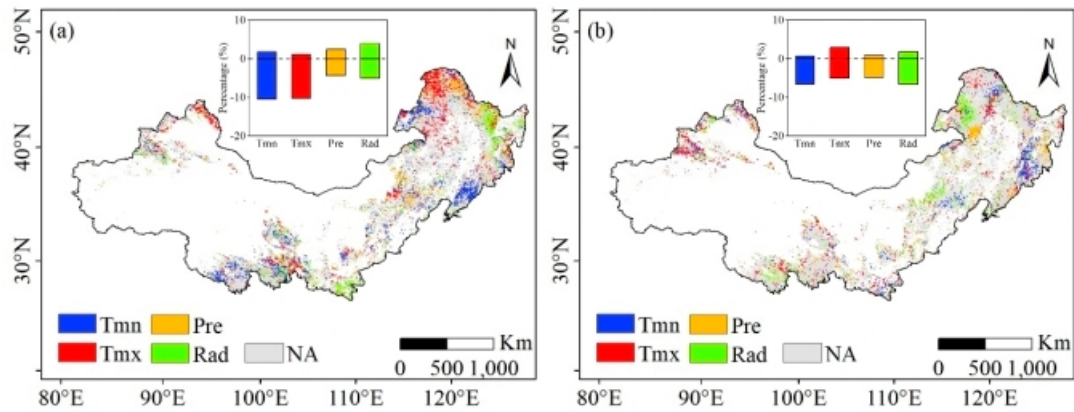

**Figure S3.** The spatial pattern of the most critical climatic factor in SOS in two sub-periods. (a): before 1998; (b): after 1998. NA represents non-significant pixels and is not counted in Figure S3(b). The top insets show the proportions of different climatic factors.

**Table S1.** The proportion of the most critical climatic factor in SOS at the vegetation type scale before 1998. Non-significant pixels were not shown.

| Types | Tmn    | Tmx    | Pre    | Rad    |
|-------|--------|--------|--------|--------|
| DNF   | 5.57%  | 27.12% | 11.25% | 8.30%  |
| DBF   | 14.13% | 8.28%  | 6.14%  | 12.97% |
| Bush  | 15.35% | 5.23%  | 5.92%  | 7.46%  |
| AM    | 17.28% | 9.75%  | 4.24%  | 8.17%  |
| SG    | 9.14%  | 5.62%  | 6.67%  | 16.48% |
| PG    | 13.63% | 11.38% | 6.88%  | 4.63%  |
| MEA   | 10.60% | 11.78% | 6.61%  | 6.66%  |

**Table S2.** The proportion of the most critical climatic factor in SOS at the vegetation type after 1998. Non-significant pixels were not shown.

| Types | Tmn    | Tmx    | Pre   | Rad    |
|-------|--------|--------|-------|--------|
| DNF   | 6.31%  | 8.27%  | 2.98% | 7.71%  |
| DBF   | 11.99% | 6.78%  | 6.31% | 6.12%  |
| Bush  | 5.83%  | 4.55%  | 6.43% | 9.35%  |
| AM    | 5.06%  | 10.22% | 4.19% | 6.69%  |
| SG    | 8.29%  | 5.43%  | 7.81% | 9.05%  |
| PG    | 5.04%  | 9.79%  | 5.21% | 9.63%  |
| MEA   | 5.98%  | 7.52%  | 7.04% | 11.52% |

**Table S3.** Trends of climatic factors over the study period.

| Period    | Tmn<br>(°C/year) | Tmx<br>(°C/year) | Pre<br>(mm/year) | Rad<br>(W/m <sup>2</sup> ·year) |
|-----------|------------------|------------------|------------------|---------------------------------|
| 1982–2014 | 0.03*            | 0.02             | 0.35*            | 3.39*                           |
| 1982–1998 | 0.09*            | 0.11*            | 0.17             | 8.15*                           |
| 1998–2014 | −0.04            | −0.05            | 0.27             | 2.72*                           |

\* represents significant at  $p < 0.05$ .
